# Supplementary material for: Evaluating Visual Acuity in the American Academy of Ophthalmology IRIS® Registry
Source: PubMed Central journal article supplement — Ophthalmol Sci. 2023 Jun 19;4(1):100352. doi: 10.1016/j.xops.2023.100352 (PMC10587626; doi:10.1016/j.xops.2023.100352), 2023-06-19
Supplement: mmc1.pdf [file mmc1.pdf]

## SUPPLEMENTAL APPENDIX:

### Modifier to logMAR Verana Logic:

```
if (snellen_denom is not None) & (mod_value is not None):
    if (snellen_denom in ["100", "114", "125", "150", "160", "200"]) & (mod_value
!= "1"):
        if mod_op == "+":
            if snellen_denom == "100":
                new_denom = "80"
            elif snellen_denom in ["114", "125"]:
                new_denom = "100"
            elif snellen_denom in ["150", "160"]:
                new_denom = "125"
            elif snellen_denom == "200":
                new_denom = "160"
        elif mod_op == "-":
            if snellen_denom == "100":
                new_denom = "125"
            elif snellen_denom in ["114", "125"]:
                new_denom = "160"
            elif snellen_denom in ["150", "160", "200"]:
                new_denom = "200"
        else:
            new_denom = snellen_denom
            snellen = snellen_num + "/" + new_denom
    elif (snellen_denom in ["70", "63", "60", "50", "40", "32", "30", "25", "20", "16",
"12.5", "10"]) & (
        mod_value not in ["1", "2"]):
        if mod_op == "+":
            if snellen_denom in ["70", "63", "60"]:
                new_denom = "50"
            elif snellen_denom == "50":
                new_denom = "40"
            elif snellen_denom == "40":
                new_denom = "32"
            elif snellen_denom in ["32", "30"]:
                new_denom = "25"
            elif snellen_denom == "25":
                new_denom = "20"
            elif snellen_denom == "20":
                new_denom = "16"
            elif snellen_denom == "16":
                new_denom = "12.5"
            elif snellen_denom in ["12.5", "10"]:
                new_denom = "10"
```

```

elif mod_op == "-":
    if snellen_denom in ["70", "63", "60"]:
        new_denom = "80"
    elif snellen_denom == "50":
        new_denom = "63"
    elif snellen_denom == "40":
        new_denom = "50"
    elif snellen_denom == "32":
        new_denom = "40"
    elif snellen_denom == "30":
        new_denom = "30"
    elif snellen_denom == "25":
        new_denom = "32"
    elif snellen_denom == "20":
        new_denom = "25"
    elif snellen_denom == "16":
        new_denom = "20"
    elif snellen_denom == "12.5":
        new_denom = "16"
    elif snellen_denom == "10":
        new_denom = "12.5"
    else:
        new_denom = snellen_denom
    snellen = snellen_num + "/" + new_denom
elif (snellen_denom == "80"):
    if (mod_value == "2") & (mod_op == "-"):
        snellen = snellen_num + "/" + "100"
    elif (mod_value in ["3", "4", "5", "6", "7", "8", "9"]) & (mod_op == "+"):
        snellen = snellen_num + "/" + "63"
    elif (mod_value in ["3", "4", "5", "6", "7", "8", "9"]) & (mod_op == "-"):
        snellen = snellen_num + "/" + "100"
    else:
        snellen = distance_cleaned
else:
    snellen = distance_cleaned

```

LogMar lookup dictionary:

```

va_value_lookup = {
    "20/10": "-0.3", "20/12.5": "-0.2", "20/15": "-0.12", "20/16": "-0.1",
    "20/20": "0.0", "20/25": "0.1", "20/30": "0.18", "20/32": "0.2",
    "20/40": "0.3", "20/50": "0.4", "20/60": "0.48", "20/63": "0.5",
    "20/65": "0.51", "20/70": "0.54", "20/80": "0.6", "20/100": "0.7",
    "20/120": "0.78", "20/125": "0.8", "20/150": "0.88", "20/160": "0.9",
    "20/200": "1.0", "20/250": "1.1", "20/300": "1.18", "20/320": "1.2",
    "20/350": "1.24", "20/400": "1.3", "20/500": "1.4", "20/600": "1.48",
    "20/630": "1.5", "20/650": "1.51", "20/800": "1.6", "20/1000": "1.7",

```

```
"20/1200": "1.78", "20/1260": "1.8", "20/1600": "1.9", "20/2000": "2.0",  
"J1": "0.0", "J2": "0.1", "J3": "0.18", "J4": "0.2", "J5": "0.3",  
"J6": "0.4", "J7": "0.48", "J8": "0.50", "J9": "0.6", "J10": "0.7",  
"J11": "0.76", "J12": "0.80", "J13": "0.90", "J14": "1.00", "NLP": "4",  
"HM": "2.3", "CF": "1.9", "LP": "2.7", "NI": "999"}
```

#### Rome Visual Acuity PostgreSQL filter:

SELECT

patient\_guid,

eye,

MIN(CAST(logmar AS DOUBLE PRECISION)) AS logmar,

result\_date,

CAST(SUBSTRING(result\_date, 1, 4) AS INTEGER) as result\_year

FROM

rome.patient\_result\_va

WHERE

CAST(SUBSTRING(result\_date, 1, 4) AS INTEGER) = 2018

AND logmar > -1

AND logmar <= 4

AND (va\_type = 1 or va\_type = 999 or refraction = 'true')

AND (va\_method = 1 OR va\_method = 999)

GROUP BY

patient\_guid,

eye,

result\_date;

#### Chicago Visual Acuity PostgreSQL filter:

WITH

logmar\_t AS (

```

SELECT
  vh_patient_observation_uid,
  patient_guid,
  laterality_code,
  observation_date
FROM
  chicago_amc_2021_12_24.patient_observation
WHERE
  cluster_code = 'VA'
GROUP BY
  vh_patient_observation_uid,
  patient_guid,
  laterality_code,
  observation_date),
logmar_with_meta AS (
SELECT
  vh_patient_observation_uid,
  patient_guid,
  laterality_code,
  observation_date,
  MAX(distance) AS distance,
  MAX(correction) AS correction,
  MAX(refraction) AS refraction,
  MAX(pinhole) AS pinhole,
  MAX(logmar) AS logmar
FROM (
  SELECT
    logmar_t.vh_patient_observation_uid,
    patient_guid,
    laterality_code,
    observation_date,
    CASE
      WHEN modifier_group = 'chart_distance' AND modifier_value = 'distance' THEN 1
      WHEN modifier_group = 'chart_distance'
      AND modifier_value = 'near' THEN 2
      WHEN modifier_group = 'chart_distance' AND modifier_value = 'unknown' THEN 3
    ELSE
      0
  END
  AS distance,
  CASE
    WHEN modifier_group = 'correction' AND modifier_value = 'corrected' THEN 1
    WHEN modifier_group = 'correction'
    AND modifier_value = 'uncorrected' THEN 2
    WHEN modifier_group = 'correction' AND modifier_value = 'unknown' THEN 3
  ELSE
    0
  END
END

```

```

AS correction,
CASE
  WHEN modifier_group = 'refraction' AND modifier_value = 'true' THEN 1
  WHEN modifier_group = "refraction"
AND modifier_value = 'false' THEN 2
ELSE
0
END
AS refraction,
CASE
  WHEN modifier_group = 'pinhole' AND modifier_value = 'true' THEN 1
  WHEN modifier_group = 'pinhole'
AND modifier_value = 'false' THEN 2
ELSE
0
END
AS pinhole,
CASE
  WHEN modifier_group = 'logmar' THEN ROUND(CAST(modifier_value AS FLOAT), 2)
ELSE
-1.0
END
AS logmar
FROM
  logmar_t
JOIN
  chicago_amc_2021_12_24.patient_observation_modifier
ON
  logmar_t.vh_patient_observation_uid = patient_observation_modifier.vh_patient_observation_uid)
GROUP BY
  vh_patient_observation_uid,
  patient_guid,
  laterality_code,
  observation_date,
  logmar )
SELECT
*
FROM
  logmar_with_meta;

```
