# Supplementary material for: Evaluating Visual Acuity in the American Academy of Ophthalmology IRIS® Registry
Source: PubMed Central journal article supplement — Ophthalmol Sci. 2023 Jun 19;4(1):100352. doi: 10.1016/j.xops.2023.100352 (PMC10587626; doi:10.1016/j.xops.2023.100352), 2023-06-19
Supplement: mmc2.pdf [file mmc2.pdf]

**Supplemental Table 3: Correspondence Between Modified logMAR and Modified Snellen Visual Acuity Measurements in the 2018 American Academy of Ophthalmology Intelligent Research In Sight (IRIS) Registry**

| Modified LogMAR | Modified Snellen      | Rome Count (%)     | Chicago Count (%)  |
|-----------------|-----------------------|--------------------|--------------------|
| -0.3            | 20/10                 | 44097 (0.032%)     | 47335 (0.028%)     |
| -0.2            | 20/12.5               | 5646 (0.004%)      | 8661 (0.005%)      |
| -0.12           | 20/15                 | 1190042 (0.874%)   | 1375549 (0.814%)   |
| -0.1            | 20/16                 | 78897 (0.058%)     | 74257 (0.044%)     |
| 0               | 20/20                 | 39020817 (28.66%)  | 52529417 (31.097%) |
| 0.1             | 20/25                 | 25358146 (18.625%) | 31147432 (18.439%) |
| 0.18            | 20/30                 | 21331289 (15.667%) | 25560138 (15.132%) |
| 0.2             | 20/32                 | 479083 (0.352%)    | 454203 (0.269%)    |
| 0.3             | 20/40                 | 16332241 (11.996%) | 19290398 (11.42%)  |
| 0.4             | 20/50                 | 8501405 (6.244%)   | 9738946 (5.765%)   |
| 0.48            | 20/60                 | 5160031 (3.79%)    | 6278148 (3.717%)   |
| 0.5             | 20/63                 | 97668 (0.072%)     | 176940 (0.105%)    |
| 0.51            | 20/63                 | 0 (0%)             | 1666 (0.001%)      |
| 0.54            | 20/70                 | 3206294 (2.355%)   | 3598657 (2.13%)    |
| 0.6             | 20/80                 | 2392274 (1.757%)   | 2820986 (1.67%)    |
| 0.7             | 20/100                | 2622533 (1.926%)   | 3478512 (2.059%)   |
| 0.76            | 20/115                | 0 (0%)             | 12286 (0.007%)     |
| 0.78            | 20/120                | 4295 (0.003%)      | 4538 (0.003%)      |
| 0.8             | 20/125                | 364060 (0.267%)    | 304693 (0.18%)     |
| 0.88            | 20/150                | 0 (0%)             | 1269886 (0.752%)   |
| 0.9             | 20/150                | 1124964 (0.826%)   | 70321 (0.042%)     |
| 1               | 20/200                | 2953891 (2.17%)    | 3421849 (2.026%)   |
| 1.1             | 20/250                | 195140 (0.143%)    | 225364 (0.133%)    |
| 1.18            | 20/300                | 324472 (0.238%)    | 373810 (0.221%)    |
| 1.2             | 20/320                | 10501 (0.008%)     | 11966 (0.007%)     |
| 1.24            | 20/350                | 52177 (0.038%)     | 58905 (0.035%)     |
| 1.3             | 20/400                | 1942269 (1.427%)   | 2217313 (1.313%)   |
| 1.4             | 20/500                | 61441 (0.045%)     | 74308 (0.044%)     |
| 1.48            | 20/600                | 26226 (0.019%)     | 33164 (0.02%)      |
| 1.5             | 20/630                | 3047 (0.002%)      | 3151 (0.002%)      |
| 1.51            | 20/630                | 0 (0%)             | 78 (0.0%)          |
| 1.6             | 20/800                | 75672 (0.056%)     | 89021 (0.053%)     |
| 1.7             | 20/1000               | 4098 (0.003%)      | 5266 (0.003%)      |
| 1.78            | 20/1200               | 407 (<0.001%)      | 457 (0.0%)         |
| 1.8             | 20/1260               | 2 (<0.001%)        | 2 (0.0%)           |
| 1.9             | CF (Chicago), 20/1600 | 2454 (0.002%)      | 2320623 (1.374%)   |
| 2               | CF (Rome), 20/2000    | 1920771 (1.411%)   | 1511 (0.001%)      |
| 2.3             | HM (Chicago)          | 0 (0%)             | 761187 (0.451%)    |
| 2.7             | LP (Chicago)          | 0 (0%)             | 354692 (0.21%)     |
| 3               | LP, HM (Rome)         | 967082 (0.71%)     | 0 (0%)             |

|   |     |                |                 |
|---|-----|----------------|-----------------|
| 4 | NLP | 299372 (0.22%) | 335127 (0.198%) |
|---|-----|----------------|-----------------|
